# Supplementary material for: Measuring the Burden of Disease in Korea, 2008-2018
Source: PubMed Central journal article supplement — J Prev Med Public Health. 2021 Sep 30;54(5):293–300. doi: 10.3961/jpmph.21.478 (PMC8517373; doi:10.3961/jpmph.21.478), 2021-09-30

# Supplemental Material 1. Top 30 leading specific causes (levels 3 and 4) of DALY rate in South Korea, 2018.

DALY, disability-adjusted life year; YLL, years of life lost; YLD, years lived with disability.

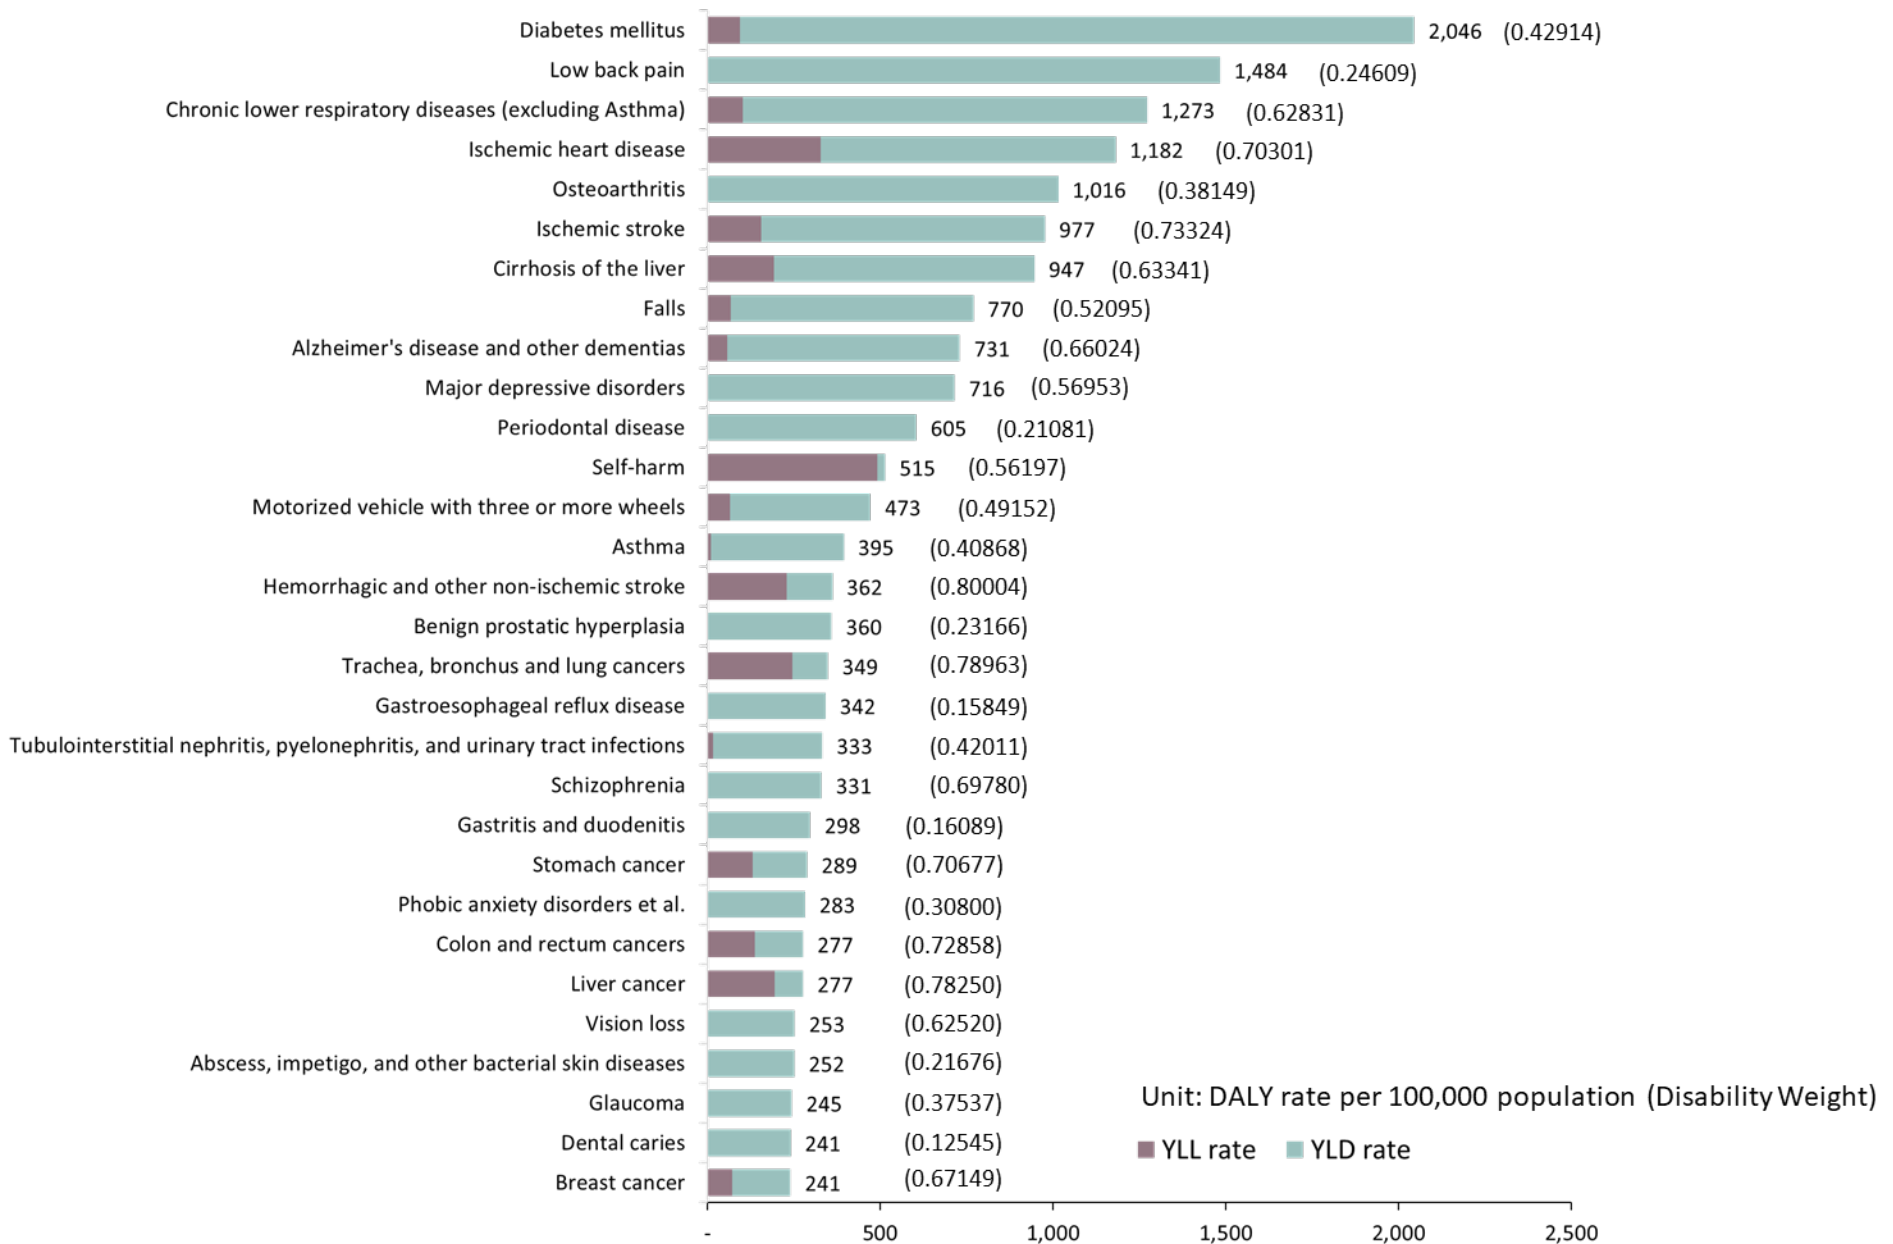

Supplement: jpmph-21-478-suppl1.pdf [file jpmph-21-478-suppl1.pdf]
