# Supplementary material for: Measuring the Burden of Disease in Korea, 2008-2018
Source: PubMed Central journal article supplement — J Prev Med Public Health. 2021 Sep 30;54(5):293–300. doi: 10.3961/jpmph.21.478 (PMC8517373; doi:10.3961/jpmph.21.478), 2021-09-30
Supplement: jpmph-21-478-suppl3.pdf [file jpmph-21-478-suppl3.pdf]

### Supplemental Material 3. DALY rate, YLL rate, and YLD rate, per 100,000 population by region in South Korea in 2018.

DALY, disability-adjusted life year; YLLs, years of life lost; YLDs, years lived with disability.

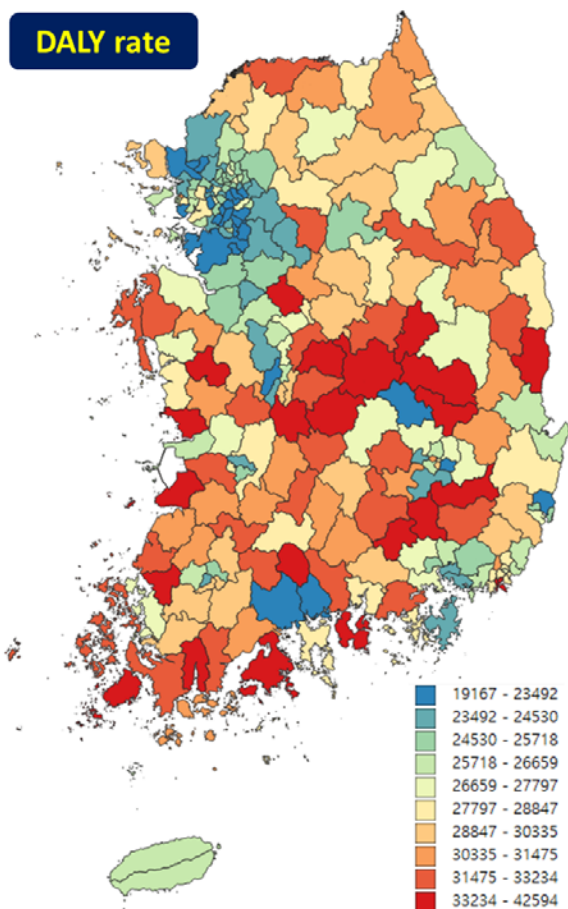

Unit: DALY rate per 100,000 population

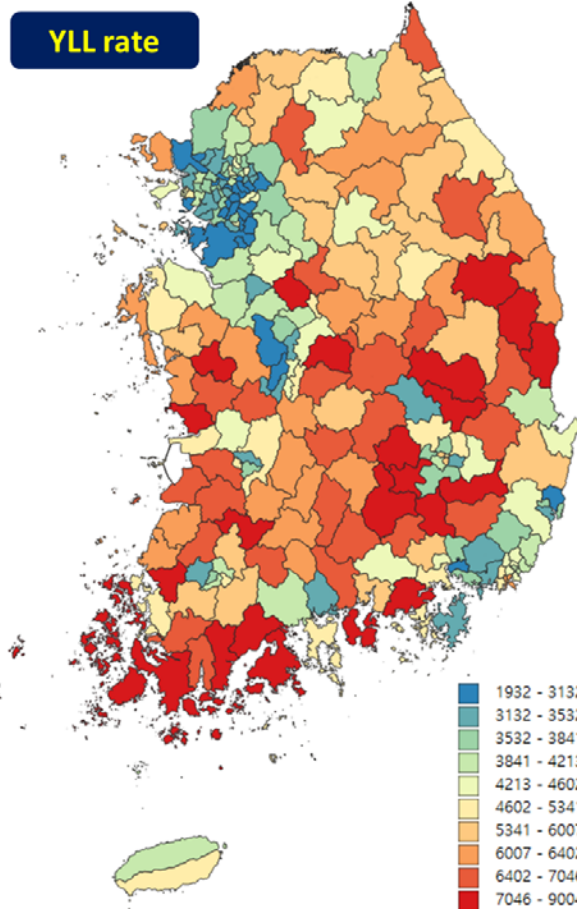

Unit: YLL rate per 100,000 population

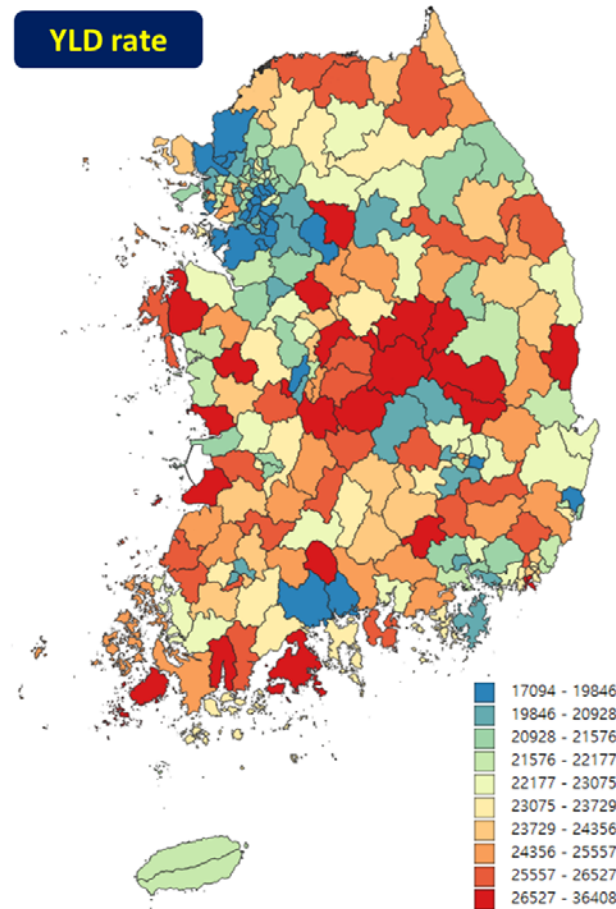

Unit: YLD rate per 100,000 population
