# Supplementary material for: Measuring the Burden of Disease in Korea, 2008-2018
Source: PubMed Central journal article supplement — J Prev Med Public Health. 2021 Sep 30;54(5):293–300. doi: 10.3961/jpmph.21.478 (PMC8517373; doi:10.3961/jpmph.21.478), 2021-09-30

# Supplemental Material 4. DALY rates per 100,000 population by income level in South Korea in 2018.

DALY, disability-adjusted life year.

Unit: DALY rate per 100,000 population

Q1 (Lowest) Q2 Q3 Q4 Q5 (Highest)

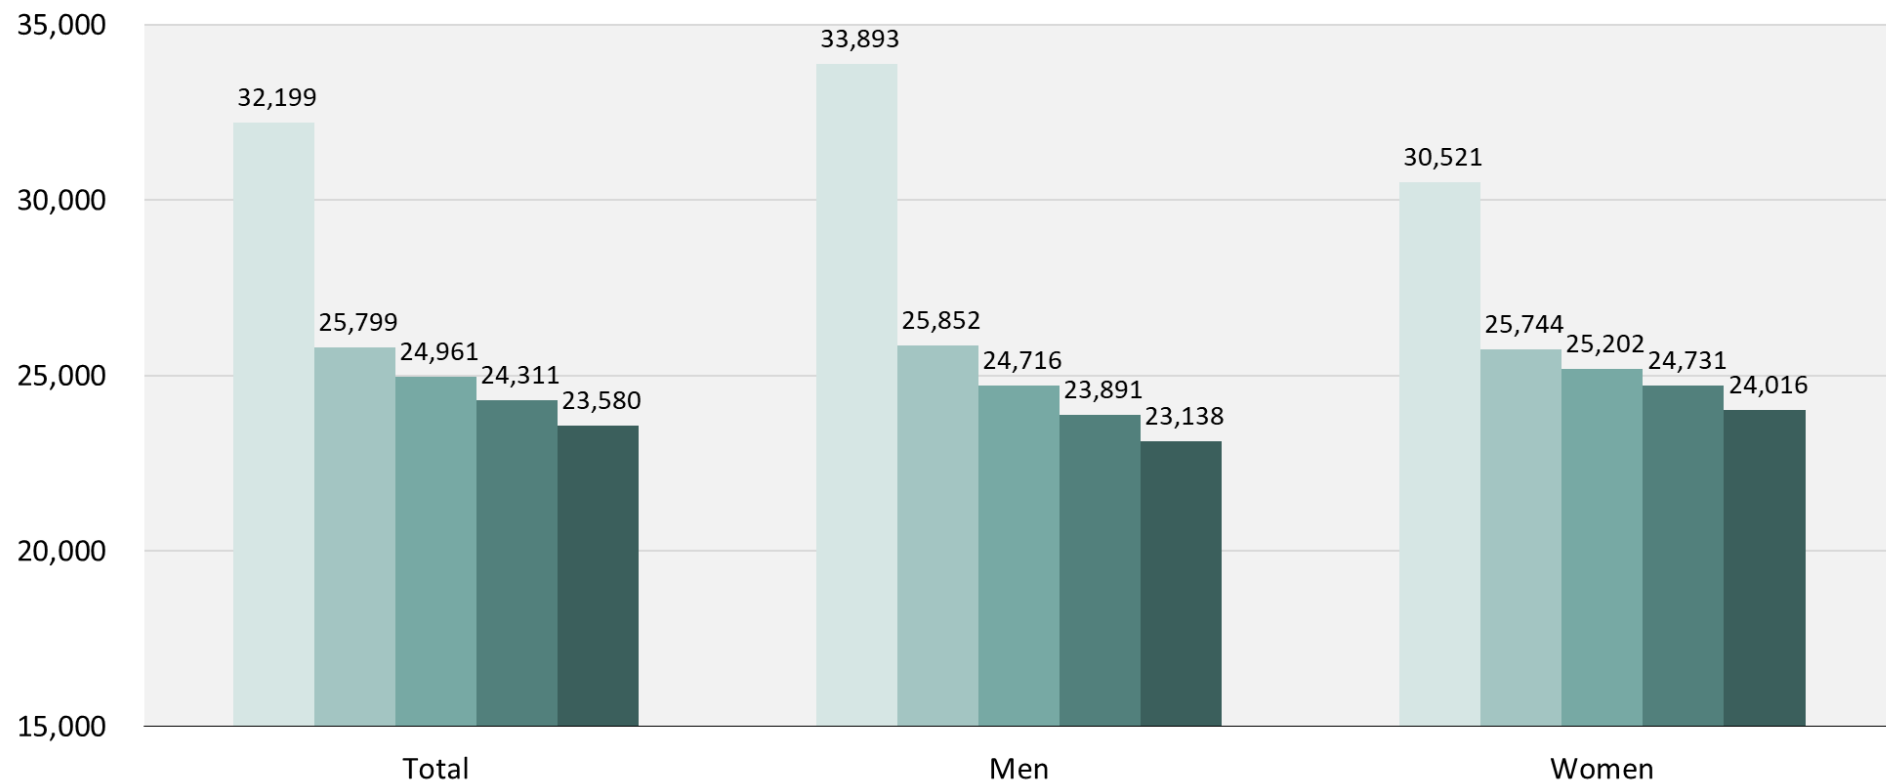

Supplement: jpmph-21-478-suppl4.pdf [file jpmph-21-478-suppl4.pdf]
